# Supplementary material
Source: ML conference proceedings conference paper supplement (https://openreview.net/forum?id=l4CZCKXoSn)
Supplement: supplementary_material [file attachment]

## 558 Appendix

559 The appendix of this paper is structured as follows.

- 560 • Section A introduces the evaluated datasets and their statistics.
- 561 • Section B introduces the preprocessing procedure in our experiments.
- 562 • Section C details the compared baselines in our experiments.
- 563 • Section D introduces the used backbone model structure and their related configurations.
- 564 • Section E summarizes the training strategies we applied in this paper.
- 565 • Section F presents more comprehensive evaluation results.
- 566 • Section G lists the existing limitations of the work and potential solutions for future exten-  
567 sions.

## 568 A Datasets

569 The basic statistics for each dataset are summarized in Table 3.

570 **Moving Object Detection (MOD):** This is a self-collected dataset using sensor nodes consisting of  
571 a RaspberryShake 4D (from <https://raspberrysshake.org/>) and a microphone array to collect  
572 the vibration signals caused by nearby moving vehicles. The data was collected from two different  
573 sites, where one was a former State park repurposed for research purposes, while the other was a large  
574 college parking lot. The RaspberryShake featured a geophone designed to measure seismic vibrations  
575 due to remote earthquakes. It was found to be much more sensitive to vibrations introduced by  
576 nearby moving objects than, say, accelerometers on a smartphone. In this dataset, we introduced each  
577 of seven different targets alternately in the vicinity of the sensor nodes: A Polaris off-road vehicle  
578 (from <https://ranger.polaris.com/>), a Chevrolet Silverado, a Warthog all-terrain Unmanned  
579 Ground Vehicle (from <https://clearpathrobotics.com/>), a Motorcycle, a Tesla, a Mustang,  
580 and a dismount human. Each target moved around at a different speed, while our sensors collected  
581 the corresponding seismic and acoustic signals. Only one target is considered during our experiments.  
582 The sampling rate for the seismic signal was 100Hz and the acoustic signal was collected under  
583 16000Hz (which was downsampled to 8000Hz in the preprocessing). For each target, the collection  
584 lasted between 40 minutes to 1 hour. The training, validation, and testing datasets are randomly  
585 partitioned with a ratio of 8:1:1 at the sample level. (See IRB note.<sup>5</sup>) We do plan to release this  
586 dataset for public usage after the paper anonymization period.

587 **Acoustic-seismic identification Data Set (ACIDS):** ACIDS is an ideal dataset for developing  
588 and training acoustic/seismic classification/ID algorithms. The data was collected by 2 co-located  
589 acoustic/seismic sensor systems. There are over 270 data runs (single target only) from 9 different  
590 types of ground vehicles in 3 different environmental conditions. The ground vehicles were traveling  
591 at constant speeds from one direction toward the sensor systems passing the closest point of approach  
592 (CPA) and then away from the sensor systems. The microphone data is low-pass filtered at 400 Hz  
593 via a 6th-order filter to prevent spectral aliasing and high-pass filtered at 25 Hz via a 1st-order filter  
594 to reduce wind noise. The data is digitized by a 16-bit A/D at the rate of 1025 Hz. The CPA to the  
595 sensor systems varied from 25m to 100m. The speed varied from 5km/hr to 40km/hr depending  
596 upon the particular run, the vehicle, and the environmental condition. We randomly partition the runs  
597 into training, validation, and testing datasets with a ratio of 8:1:1. It is more challenging than MOD  
598 since domain shift caused by vehicle speed, distance, or terrain between training and testing can be  
599 included. No information related to the target types is revealed except the numerical labels.

600 **RealWorld-HAR [18]:** This is a public dataset using the accelerometer, gyroscope, magnetometer,  
601 and light signals to recognize 8 common human activities (climbing stairs down and up, jumping,  
602 lying, standing, sitting, running/jogging, and walking) from 15 subjects. Only the data collected from  
603 "waist" is used in our experiments. The sampling rate of all selected sensors is 100Hz. We use the

---

<sup>5</sup>The work was deemed Not Human Subjects Research (NHSR) because the purpose of the experiment was to test the performance of an AI algorithm in the presence of noise, as opposed to collecting data about humans. The humans who assisted with the experiment, in essence, acted as "lab technicians" who operate machinery for experimental purposes.

Table 3: Statistical Summary of Selected Datasets.

| Dataset       | Classes | Modalities (Freq)                  | Sample Length | Interval (Overlap) | #Samples | #Labels |
|---------------|---------|------------------------------------|---------------|--------------------|----------|---------|
| MOD           | 7       | acoustic (8000Hz), seismic (100Hz) | 2 sec         | 0.2 sec (0%)       | 39,609   | 7,335   |
| ACIDS         | 9       | acoustic, seismic (both 1025Hz)    | 1 sec         | 0.25 sec (50%)     | 27,597   | 27,597  |
| RealWorld-HAR | 8       | acc, gyro, mag, lig (all 50Hz)     | 5 sec         | 1 sec (50%)        | 12,887   | 12,887  |
| PAMAP2        | 18      | acc, gyr, mag (all 100Hz)          | 2 sec         | 0.4 sec (50%)      | 9,611    | 9,611   |

604 leave-one-out evaluation strategy where 10 random subjects are used for training, 2 subjects are used  
605 for validation, and 3 subjects are used for testing.

606 **Physical Activity Monitoring dataset (PAMAP2) [16]:** This dataset contains data of 18 different  
607 physical activities (e.g., walking, cycling, playing soccer, etc) performed by 9 subjects using inertial  
608 measurement units (IMUs) that are put at the chest, wrist (of dominant arm), and dominant side’s  
609 ankle respectively. Only data collected from the "wrist" is used in our experiment. Each IMU records  
610 readings from a 3-axis accelerometer, gyroscope, and magnetometer. The sampling rates of all  
611 sensors are 100Hz. We use the leave-one-out evaluation strategy where 7 random subjects are used  
612 for training, and 2 subjects are used for testing.

## 613 B Data Preprocessing

614 In our data preprocessing, we first divide the time-series data into equal-length data samples and  
615 further segment each sample into overlapped/non-overlapped intervals. The signals within each  
616 interval are processed by the Fourier transform to obtain the spectrum. In this way, both the time-  
617 domain information and frequency-domain patterns are preserved. The length of the samples and  
618 the intervals, as well as the time overlap ratios between intervals within samples of each dataset,  
619 as listed in Table 3, are configured to achieve the best-supervised classification performance. The  
620 generated time-frequency spectrogram is further fed into the backbone feature encoders. We define a  
621 set of data augmentations in both the time domain before the Fourier transform and the frequency  
622 domain after the Fourier transform. For each sample, only one random augmentation from either the  
623 time domain or the frequency domain is selected and applied. To further increase the randomness of  
624 data augmentations in multimodal applications, we let each modality have a probability of 0.5 to be  
625 processed by the selected random augmentation.

### 626 B.1 Data Augmentations

627 We follow the common practices in [22, 7, 10, 19] to define the augmentations used in the time  
628 domain and frequency domain respectively.

#### 629 B.1.1 Time-Domain Augmentations

630 Here we list the used time-domain augmentations.

- 631 • **Scaling:** We multiply the input signals with values sampled from a Gaussian distribution.
- 632 • **Permutation:** Given intervals within a sample, we randomly permute the order of the  
633 intervals.
- 634 • **Negation:** The signal values are multiplied by a factor of -1.
- 635 • **Time Warp:** Randomly stretching/distorting the time locations of the signal values based  
636 on a smooth random curve.
- 637 • **Magnitude Warp:** The magnitude of each time series is multiplied by a curve created by  
638 cubicspline with a set number of knots at random magnitudes.
- 639 • **Horizontal Flip:** The entire time series of the sample is flipped in the time direction.
- 640 • **Jitter:** We add random Gaussian noise to signals.
- 641 • **Channel Shuffle:** We randomly shuffle the channels of multi-variate time-series data (e.g.,  
642 X, Y, Z dimensions of three-axis accelerometer input).
- 643 • **Time Masking:** We randomly mask a portion of the time intervals within a sample window  
644 with 0.

645 **B.1.2 Frequency-Domain Augmentations**

646 Here we list the used frequency-domain augmentations.

- 647 • **Phase Shift:** Given the complex frequency spectrum, we add a random value between  $-\pi$   
648 to  $\pi$  to their phase values.
- 649 • **Frequency Masking:** We randomly mask a portion of frequency ranges with 0.

650 **C Baselines**

651 **Supervised:** We train the whole model including the encoder and linear classifier in a fully supervised  
652 manner using all available labels.

653 **SimCLR** [1] is a simple yet powerful contrastive learning framework proposed for vision tasks. For  
654 this work, we randomly formulate batches. During pretraining, we apply random augmentations  
655 to generate two different views of each sample, with a contrastive objective of bringing different  
656 transformations (augmentations) of the same samples closer while repelling the representations of  
657 different samples. The framework optimizes the parameters of the underlying backbone model by  
658 minimizing the NT-Xent loss [1]. Similar to [1], we take different samples from the same minibatch  
659 as the negative samples. That is, different views of the same sample are considered positive pairs,  
660 while views generated from different samples are considered negative pairs.

661 **MoCoV3** [2] is a SOTA contrastive learning framework for Vision Transformers (ViT). It leverages  
662 a query encoder  $f_q$  and a key momentum encoder  $f_k$  on two stochastically augmented views of a  
663 sample to output a query vector  $q$  and a key vector  $k$ . It uses random batch sampling and learns by  
664 maximizing the agreement between the positive encoded query and an encoded key pair. In the latest  
665 version of MoCo (V3), for a given query  $q$ , the positive key  $k^+$  is encoded from the same sample as  
666  $q$ , while the negative labels  $k^-$  are encoded keys of other samples within the same mini-batch. Both  
667 encoders have a similar structure including a backbone plus a projection head, and the query encoder  
668  $f_q$  has an additional projection head at the end. The key momentum encoder  $f_k$  is slowly updated by  
669 a query momentum with the query encoder  $f_q$ .

670 **CMC** [20] is a contrastive learning framework focusing on learning from multiview observations. It  
671 learns meaningful data representations by contrasting the encoded features from different modalities.  
672 To achieve this, it maximizes the agreement between the synchronized representations of different  
673 modalities. For each randomly sampled batch with a random augmentation, the backbone model  
674 extracts vector representations of each modality. Then, for each pair of modalities, we maximize the  
675 similarity between modality representations of the same samples and regard mismatched modality  
676 representations from different samples as negative pairs. We sum up the losses for all pairs of  
677 modalities to optimize the backbone parameters. For downstream tasks, a linear classification layer is  
678 applied on top of concatenated modality representations.

679 **MAE** [6] is a self-supervised learning approach based on the auto-encoding paradigm. It incorporates  
680 the Transformer architecture and achieves SOTA performance on multiple vision tasks. Unlike  
681 contrastive learning, MAE does not depend heavily on random augmentations. During the pretraining,  
682 we randomly mask a significant portion (*i.e.*, 75%) of each modality input. Instead of dropping the  
683 masked patches as in the original MAE paper, we replace them with 0 values to ensure consistent  
684 dimensions for the Swin-Transformer and DeepSense operations. A separate encoder and decoder are  
685 used for each modality. Before encoding, the modality spectrogram is first projected into fixed-size  
686 (*e.g.*, 2x2) patches through a convolutional layer, on top of which the modality embeddings are  
687 extracted by the modality encoder. Between independent modality encoding and decoding, we first  
688 apply multiple fully-connected layers to the concatenated modality features for modality information  
689 fusion and then use separate MLP projection layers to get the projected modality embeddings before  
690 decoding. This step is created to enable interactions between modalities. Finally, the modality decoder  
691 reconstructs the modality input from the projected modality embeddings. The overall objective is to  
692 minimize the mean squared error (MSE) between the original modality patches and the reconstructed  
693 modality patches on the masked locations. During the inference, the modality decoders are dropped  
694 and only modality encoders are used to extract the latent representations from unmasked modality  
695 input. In the end, a linear classification layer is applied to the concatenated modality embeddings to  
696 serve the downstream task.

697 **Cosmo** [14] focuses on contrastive fusion learning from multimodal time-series data to extract  
698 modality-consistent information. Cosmo applies separate modality encoders to extract the embedding  
699 vector of each modality from the randomly sampled mini-batches. After encoding, each modality  
700 embedding is mapped to a hypersphere through an MLP projector and a normalization layer. Then,  
701 Cosmo applies a fusion-based feature augmentation to generate  $P$  randomly combined features by  
702 multiplying the modality embeddings with  $P$  normalized random weight vectors. When calculating  
703 contrastive loss, these  $P$  fusion-based augmented features are considered as positive pairs, while  
704 features generated through the same approach but from different samples are treated as negative pairs.

705 **Cocoa** [3] extends the self-supervised learning of multimodal sensing data by exploring both the cross-  
706 modal correlation and intra-modal separation. Similar to other modality-level contrastive frameworks,  
707 Cocoa applies a separate backbone encoder to extract the latent embedding of each modality from the  
708 randomly sampled and augmented mini-batch. Cocoa has two losses: Cross-modality correlation loss  
709 and discriminator loss. Cross-modality correlation loss maximizes the consistency between different  
710 modality embeddings corresponding to the same sample by defining them as hard positive pairs. On  
711 the contrary, discriminator loss tends to minimize the agreement within a modality, by separating  
712 modality embeddings of irrelevant samples within the mini-batch from each other.

713 **GMC** [15] introduces a multimodal contrastive loss function that encourages the geometric alignment  
714 of different modality embeddings. Similar to other multimodal contrastive frameworks, samples are  
715 randomly batched and augmented. GMC consists of modality-specific encoders and a joint encoder  
716 that simultaneously takes all modality data as input. An additional linear layer is used to map the  
717 joint embedding to the same space as individual modality embeddings. Then, a shared projection  
718 head is then employed to project both the modality embeddings and the joint embeddings before  
719 calculating the contrastive loss. To align the local views (*i.e.*, individual modality embeddings) with  
720 the global view (*i.e.*, joint embeddings) in a context-aware manner, GMC minimizes a multimodal  
721 contrastive NT-Xent loss by defining the modality-specific embeddings and joint embeddings of the  
722 same samples as positive pairs, while treating local-global embedding pairs from different samples as  
723 negative pairs.

724 **MTSS** [17] is a predictive self-supervised learning framework by exploiting the distinguishability  
725 among different data transformations. It uses random augmentation ID prediction as the pretext  
726 task during the pretraining. Specifically, MTSS first formulates random batches and applies random  
727 augmentation to either time or frequency domain. Each modality is augmented with the selected  
728 random augmentation with a probability of 50%. Then, individual modality encoders extract modality  
729 embeddings from their input, followed by modality fusion to compute the overall sample embeddings.  
730 Different from contrastive frameworks, a shallow classifier is included to classify “which random  
731 augmentation is applied to the input”. A cross-entropy loss is calculated between the predicted  
732 augmentation ID and the actual augmentation ID as the pertaining objective. For downstream tasks,  
733 only the backbone sample encoder (including the modality encoder and modality fusion layers) is  
734 used to extract the sample embeddings, along with a linear classification layer appended at the end of  
735 the sample encoder.

736 **TS2Vec** [24] proposes to learn representations of time series by simultaneously performing temporal  
737 contrastive tasks and instance contrastive tasks at multiple granularities (*i.e.*, lengths of sample win-  
738 dows). Instead of creating random batch samples, TS2Vec involves randomly sampled sequences in  
739 each batch, with each sequence containing temporally close samples. TS2Vec employs a hierarchical  
740 contrasting method to learn representations at multiple sample window granularities. It always regards  
741 the same sample under different augmentations and sequence contexts as the positive pairs, while  
742 in the instance contrastive task, different samples from separate sequences are regarded as negative  
743 pairs, and in the temporal contrastive task, different samples within the same sequence are regarded  
744 as negative pairs. At each sample window level, TS2Vec computes both the temporal contrastive loss  
745 and instance discrimination loss.

746 **TNC** [21] learns time series representations with a debiased contrastive objective to distinguish  
747 samples within the temporal neighborhood from temporally distant samples. It utilizes a backbone  
748 encoder to extract the feature representations from the time series data in a randomly sampled  
749 sequence batch. For each sample, TNC identifies a group of samples with similar timestamps as  
750 neighboring samples and a group of distant samples as non-neighboring samples. In this paper, we  
751 consider samples within the same sequence as the neighboring samples and samples from different  
752 sequences as non-neighboring samples. A discriminator is used to learn the time series distribution

Table 4: DeepSense Configurations.

| Dataset          | MOD                     | ACIDS | RealWorld-HAR | PAMAP2 |
|------------------|-------------------------|-------|---------------|--------|
| Dropout Ratio    | 0.2                     | 0.2   | 0.2           | 0.2    |
| Mod Conv Kernel  | aud: [1, 5], sei: [1,3] | [1,4] | [1, 3]        | [1, 5] |
| Mod Conv Channel | 128                     | 128   | 128           | 64     |
| Mod Conv Layers  | 5                       | 6     | 6             | 4      |
| Recurrent Dim    | 256                     | 128   | 256           | 64     |
| Recurrent Layers | 2                       | 2     | 2             | 2      |
| FC Dim           | 512                     | 256   | 256           | 128    |

753 by predicting the probability of each sample and its neighboring/non-neighboring samples being in  
754 the same window. The objective is to maximize the similarity of neighboring samples while pushing  
755 the similarity of non-neighboring samples to zero.

756 **TS-TCC** [4] learns robust representation by performing cross-view predictions and contrasting both  
757 temporal and contextual information. It randomly groups multiple sequences into a mini-batch. It  
758 first generates two views through random augmentations on each sample. For each view, it extracts  
759 context vectors of each timestamp from all sample representations up to this timestamp within the  
760 sequence with an autoregressive model and then uses the context vectors from one view to predict  
761 the future timesteps of the other view. In the temporal contrastive task, given cross-view predicted  
762 representations at a future timestamp, it regards the true future representation at that timestamp from  
763 the same sequence as the positive pair and regards samples at that timestamp from other sequences as  
764 negative pairs. In the contextual contrastive task, TS-TCC calculates NT-Xent loss by considering  
765 different augmentations of the same sample as positive pairs and considering different samples within  
766 the same mini-batch as negative pairs.

## 767 D Backbone Models

768 We tested with two different backbone encoders in this paper: DeepSense and Swin-Transformer (SW-  
769 T for short). Both models process the spectrogram of each input sensing modality separately, before  
770 the information fusion between the sensing modalities. For each backbone model, the configuration  
771 is tuned to achieve the best-supervised model accuracy.

772 **DeepSense** [23]: It is a state-of-the-art neural network model for time-series sensing data processing.  
773 Given the time-frequency spectrogram of each sensing modality, it first uses stacked convolutional  
774 layers to extract localized modality features within each time interval. Then, modality information  
775 fusion is performed by taking the mean of flattened modality features. Finally, the features across time  
776 intervals are aggregated through recurrent layers (*e.g.*, Gated Recurrent Unit (GRU)). For learning  
777 frameworks that operate on modality-level features (*i.e.*, FOCAL, CMC, Cosmo, Cocoa, and MAE),  
778 we skip the mean fusion among modalities and use individual recurrent layers for each modality,  
779 before calculating the pretrain loss.

780 **Swin-Transformer (SW-T)** [11]: It is a state-of-the-art Transformer model for processing image  
781 data. We adapt it to process the time-frequency spectrogram input. Similar to convolution operations,  
782 it adaptively allocates attention within subframe windows of input with hierarchical resolutions.  
783 The modality input is first partitioned into patches with a convolutional layer. Then, it gradually  
784 extracts features from local and shifted windows with multiple blocks. The shift window operation is  
785 introduced to break the boundary of partitioned windows and increase the perception area of each  
786 window. Each block consists of multiple self-attention layers. The patch resolution of the feature  
787 map is halved at the end of each block by merging neighboring patches while the channel number  
788 is doubled, such that the receptive field increases as going into deeper layers while the number of  
789 patches within each window is fixed. A separate SW-T encoder is used to extract features from  
790 each modality input, after which a stack of self-attention layers is appended for information fusion  
791 from multiple modalities. Similarly, for learning frameworks that operate on modality-level features,  
792 we skip the attention-based fusion blocks and directly calculate pretrain losses on top of modality  
793 features.

Table 5: Swin-Transformer Configurations.

| Dataset                    | MOD                      | ACIDS          | RealWorld-HAR | PAMAP2        |
|----------------------------|--------------------------|----------------|---------------|---------------|
| Dropout Ratio              | 0.2                      | 0.2            | 0.2           | 0.2           |
| Patch Size                 | aud: [1, 40], sei: [1,1] | [1, 8]         | [1, 2]        | [1, 2]        |
| Window Size                | [3, 3]                   | [2,4]          | [3, 3]        | [3, 5]        |
| Mod Feature Block Num      | [2, 2, 4]                | [2, 2, 4]      | [2, 2, 2]     | [2, 2, 2]     |
| Mod Feature Block Channels | [64, 128, 256]           | [64, 128, 256] | [32, 64, 128] | [32, 64, 128] |
| Head Num                   | 4                        | 4              | 4             | 4             |
| Mod Fusion Channel         | 256                      | 256            | 128           | 128           |
| Mod Fusion Head Num        | 4                        | 4              | 4             | 4             |
| Mod Fusion Block           | 2                        | 2              | 2             | 2             |
| FC Dim                     | 512                      | 512            | 256           | 128           |

Table 6: Training configurations. (We use LR for Learning Rate)

| Dataset               | MOD                                                   | ACIDS                        | RealWorld-HAR                                  | PAMAP2                                         |
|-----------------------|-------------------------------------------------------|------------------------------|------------------------------------------------|------------------------------------------------|
| Temperature           | 0.07                                                  | 0.2                          | 0.07                                           | 0.07                                           |
| Batch Size            | 256                                                   | 256                          | 256                                            | 256                                            |
| Sequence Length       | 4                                                     | 4                            | 4                                              | 4                                              |
| Pretrain Optimizer    | AdamW                                                 | AdamW                        | AdamW                                          | AdamW                                          |
| Pretrain Max LR       | Default: 1e-4<br>Cosmo, TNC, GMC, TS2Vec, TSTCC: 1e-5 | Default: 1e-4<br>Cosmo: 1e-5 | Default: 1e-4<br>CMC, GMC: 5e-4<br>Cosmo: 1e-5 | Default: 1e-4<br>CMC, GMC: 5e-4<br>Cosmo: 1e-5 |
| Pretrain Min LR       | 1e-07                                                 | 1e-07                        | 1e-07                                          | 1e-07                                          |
| Pretrain Scheduler    | Cosine                                                | Cosine                       | Cosine                                         | Cosine                                         |
| Pretrain Epochs       | 6000                                                  | 3000                         | 1000                                           | 1000                                           |
| Pretrain Weight Decay | 0.05                                                  | 0.05                         | 0.05                                           | 0.05                                           |
| Finetune Optimizer    | Adam                                                  | Adam                         | Adam                                           | Adam                                           |
| Finetune Start LR     | 0.001                                                 | 0.0003                       | 0.001                                          | 0.001                                          |
| Finetune Scheduler    | step                                                  | step                         | step                                           | step                                           |
| Finetune LR Decay     | 0.2                                                   | 0.2                          | 0.2                                            | 0.2                                            |
| Finetune LR Period    | 50                                                    | 50                           | 50                                             | 50                                             |
| Finetune Epochs       | 200                                                   | 200                          | 200                                            | 200                                            |

## 794 E Training Configurations

795 In this section, we detail the training strategies used in this paper, which are summarized in Table 6.  
 796 For each framework, the same configuration is mostly shared between different backbone encoders  
 797 with few exceptions.

798 During the pretraining, we use the AdamW [12] optimizer with the cosine schedules [13]. The start  
 799 learning rate is tuned accordingly for each framework according to their convergence situation. We  
 800 did observe Cosmo [14] is hard to converge in some cases thus we have to reduce its start learning  
 801 rate. The used batch size is 256, where 64 short sequences of 4 samples are randomly selected in  
 802 each batch. The constitution of sequences is determined at the initialization and does not change over  
 803 training epochs. The temperature is tuned to achieve the best linear classification performance after  
 804 the finetuning. A weight decay of 0.05 is used as the training regularization.

805 During the finetuning, we use the Adam [9] optimizer with the step scheduler. Essentially, the  
 806 learning rate decays by 0.2 at the end of each period. By default, finetuning runs for 200 epochs in  
 807 total, and each period is 50 epochs. Besides, the weight decay parameter is separately tuned for each  
 808 framework for the best balance between training fit and validation fit.

809 The models are trained on a lab workstation with AMD Threadripper PRO 3000WX Processor of  
 810 64 cores and NVIDIA RTX 3090 GPUs. The implementation is based on PyTorch 1.14, and the  
 811 pretraining on a single GPU spans between 3 hours to 4 days among different datasets and backbone  
 812 encoders.

## 813 F Additional Evaluation Results

814 In this section, we report additional evaluation results and analyses that are not included in the main  
 815 paper.

816 **F.1 Finetuning: Complete Linear Classification Results**

817 **Setup:** For each dataset, we apply two backbone encoders (DeepSense and SW-T), and finetune the  
818 linear classifier with three different ratios of available labels (100%, 10%, and 1%). For label ratios  
819 10% and 1%, we take 5 random portions of labels for finetuning in each training framework and  
820 report the mean and standard deviation among the runs with all testing data. The best result under  
821 each configuration is highlighted with the **bold** text. Besides, we also train a supervised model for  
822 each configuration as a reference to the self-supervised frameworks.

823 **Analysis:** Table 7, Table 8, Table 9, and Table 10 summarize the complete linear finetuning results  
824 on MOD, ACIDS, RealWorld-HAR, and PAMAP2 datasets, respectively.

825 First, FOCAL consistently demonstrates significant improvements in both accuracy and F1 score  
826 across all label ratios compared to other self-supervised learning baselines on the ACIDS, RealWorld-  
827 HAR, and PAMAP2 datasets. In the case of the MOD dataset under 1% labels, FOCAL achieves  
828 similar accuracy to TNC with the DeepSense encoder but beats TNC by 10.56% with the SW-T  
829 encoder. These results underline the superior performance of FOCAL in multimodal time series  
830 sensing data and emphasize the importance of the underlying relationship between the shared and  
831 private modality features through time.

832 Second, the performance improvements persist across backbone encoders and different label ratios,  
833 proving the advantage of FOCAL in improving the label efficiency during downstream finetuning.  
834 Although there are a few cases where some baselines perform close to FOCAL (*e.g.*, TNC with  
835 DeepSense encoder on MOD dataset under 1% labels), such comparability does not persist across  
836 encoders.

837 Third, FOCAL shows comparable performance to the supervised model when all available labels  
838 (*i.e.*, 100%) are used in the training. However, when fewer labels are available, FOCAL shows a  
839 larger advantage over the supervised oracle, demonstrating its capability to better leverage the limited  
840 available labels in adapting to downstream tasks. On average, FOCAL surpasses the supervised  
841 model by 1.37% with 100% labels, 15.04% with 10% labels, and 68.39% with 1% labels. By learning  
842 semantically meaningful multimodal representations from the massive unlabeled inputs during the  
843 pretraining phase, FOCAL can effectively utilize limited data labels during the finetuning process.  
844 This is especially reflected in the MOD results, where we have around 6 times more data in pretraining  
845 than the finetuning and achieve 3.49% and 9.58% improvement over the supervised model.

846 Fourth, between the backbone encoders, we found FOCAL brings more relative performance improve-  
847 ment to SW-T than DeepSense compared to their supervised versions. With FOCAL training, SW-T  
848 beats DeepSense in two out of four datasets (*i.e.*, MOD and RealWorld-HAR), while DeepSense is al-  
849 ways the better encoder architecture with supervised training. Besides, the performance improvement  
850 on SW-T is more significant when the number of available labels is low during the finetuning (*i.e.*,  
851 10% and 1%) since larger performance gaps are observed between FOCAL and supervised models.

852 **F.2 Finetuning: Complete KNN Classification Results**

853 **Setup:** In addition to linear probing, we further evaluate the self-supervised frameworks on four  
854 datasets using the K-Nearest-Neighbors (KNN, K=5) classifier without introducing new parameters.  
855 This evaluation method allows us to examine the quality of learned representations without new  
856 training steps. We first construct a KNN estimator using the encoded sample features and corre-  
857 sponding labels from finetuning data. For multi-modal frameworks, we directly concatenate modality  
858 embeddings as the sample-level representations. Subsequently, the estimator predicts the test labels  
859 according to the labels of neighboring samples in the supervised set  $\mathcal{X}^s$  and computes the testing  
860 accuracy accordingly.

861 **Analysis:** The complete evaluation results with the KNN classifier are reported in Table 11. FOCAL  
862 consistently surpasses the performance of other self-supervised learning baselines in most cases.  
863 The KNN evaluation results are mostly consistent with the linear classification results, but there are  
864 also a few exceptions. With the SW-T encoder, FOCAL exceeds the best baseline by an average of  
865 4.85%. When using DeepSense as the encoder, FOCAL outperforms the most competitive contrastive  
866 framework baseline by 1.18% across all datasets. In the RealWorld-HAR dataset, DeepSense with  
867 MAE achieves higher accuracy than FOCAL, but it fails in the linear classification scenario and fails  
868 to generalize to other datasets and backbone encoders. In comparison to other contrastive learning

Table 7: Fintuning Experiments with Linear Classifier on MOD dataset.

| Encoder   | Framework     | Label Ratio: 1.0 |                        | Label Ratio: 0.1       |                        | Label Ratio: 0.01      |                 |
|-----------|---------------|------------------|------------------------|------------------------|------------------------|------------------------|-----------------|
|           |               | Acc              | F1                     | Acc                    | F1                     | Acc                    | F1              |
| DeepSense | Supervised    | 0.9404           | 0.9399                 | 0.6821 ± 0.0442        | 0.6810 ± 0.0475        | 0.3567 ± 0.0450        | 0.3366 ± 0.0365 |
|           | SimCLR        | 0.8855           | 0.8855                 | 0.8186 ± 0.0055        | 0.8162 ± 0.0058        | 0.5934 ± 0.0319        | 0.5808 ± 0.0337 |
|           | MoCo          | 0.8808           | 0.8812                 | 0.7819 ± 0.0078        | 0.7763 ± 0.0089        | 0.5038 ± 0.0377        | 0.4794 ± 0.0509 |
|           | CMC           | 0.9196           | 0.9186                 | 0.8938 ± 0.0055        | 0.8920 ± 0.0056        | 0.7645 ± 0.0131        | 0.7459 ± 0.0224 |
|           | MAE           | 0.5981           | 0.5993                 | 0.4963 ± 0.0083        | 0.4985 ± 0.0041        | 0.3586 ± 0.0347        | 0.3292 ± 0.0497 |
|           | Cosmo         | 0.8989           | 0.8998                 | 0.8505 ± 0.0066        | 0.8519 ± 0.0061        | 0.7025 ± 0.0169        | 0.7025 ± 0.0171 |
|           | Cocoa         | 0.8774           | 0.8764                 | 0.8397 ± 0.0058        | 0.8378 ± 0.0055        | 0.7181 ± 0.0198        | 0.6998 ± 0.0226 |
|           | MTSS          | 0.4153           | 0.3582                 | 0.3863 ± 0.0058        | 0.3139 ± 0.0081        | 0.3140 ± 0.0084        | 0.2527 ± 0.0198 |
|           | TS2Vec        | 0.7669           | 0.7648                 | 0.7018 ± 0.0066        | 0.6980 ± 0.0070        | 0.5319 ± 0.0199        | 0.5150 ± 0.0230 |
|           | GMC           | 0.9257           | 0.9267                 | 0.8812 ± 0.0061        | 0.8820 ± 0.0069        | 0.7198 ± 0.0097        | 0.6983 ± 0.0204 |
|           | TNC           | 0.9518           | 0.9528                 | 0.9437 ± 0.0055        | 0.9446 ± 0.0054        | <b>0.8616 ± 0.0330</b> | 0.8469 ± 0.0620 |
|           | TSTCC         | 0.8707           | 0.8735                 | 0.8295 ± 0.0034        | 0.8319 ± 0.0036        | 0.6080 ± 0.0321        | 0.5753 ± 0.0553 |
| FOCAL     | <b>0.9732</b> | <b>0.9729</b>    | <b>0.9485 ± 0.0038</b> | <b>0.9480 ± 0.0039</b> | 0.8567 ± 0.0151        | <b>0.8544 ± 0.0173</b> |                 |
| SW-T      | Supervised    | 0.8948           | 0.8931                 | 0.5555 ± 0.0164        | 0.5450 ± 0.0197        | 0.2028 ± 0.0111        | 0.1638 ± 0.0196 |
|           | SimCLR        | 0.9250           | 0.9247                 | 0.8891 ± 0.0040        | 0.8888 ± 0.0042        | 0.7523 ± 0.0368        | 0.7443 ± 0.0442 |
|           | MoCo          | 0.9390           | 0.9384                 | 0.9073 ± 0.0032        | 0.9073 ± 0.0032        | 0.7482 ± 0.0228        | 0.7409 ± 0.0269 |
|           | CMC           | 0.9129           | 0.9105                 | 0.8691 ± 0.0067        | 0.8661 ± 0.0067        | 0.6994 ± 0.0157        | 0.6835 ± 0.0191 |
|           | MAE           | 0.7803           | 0.7772                 | 0.6561 ± 0.0119        | 0.6480 ± 0.0120        | 0.3764 ± 0.0200        | 0.3544 ± 0.0297 |
|           | Cosmo         | 0.3429           | 0.3378                 | 0.2122 ± 0.0087        | 0.1989 ± 0.0071        | 0.1753 ± 0.0152        | 0.1346 ± 0.0138 |
|           | Cocoa         | 0.7040           | 0.7038                 | 0.6869 ± 0.0145        | 0.6833 ± 0.0177        | 0.6122 ± 0.0162        | 0.5955 ± 0.0300 |
|           | MTSS          | 0.4206           | 0.4163                 | 0.3799 ± 0.0087        | 0.3700 ± 0.0081        | 0.3113 ± 0.0259        | 0.2964 ± 0.0191 |
|           | TS2Vec        | 0.7254           | 0.7174                 | 0.6522 ± 0.0086        | 0.6434 ± 0.0099        | 0.4750 ± 0.0225        | 0.4477 ± 0.0355 |
|           | GMC           | 0.8640           | 0.8611                 | 0.7712 ± 0.0049        | 0.7685 ± 0.0053        | 0.5191 ± 0.0209        | 0.4959 ± 0.0348 |
|           | TNC           | 0.8533           | 0.8539                 | 0.8436 ± 0.0068        | 0.8443 ± 0.0070        | 0.7996 ± 0.0331        | 0.7935 ± 0.0419 |
|           | TSTCC         | 0.8734           | 0.8735                 | 0.8564 ± 0.0040        | 0.8558 ± 0.0038        | 0.7473 ± 0.0220        | 0.7322 ± 0.0470 |
| FOCAL     | <b>0.9805</b> | <b>0.9800</b>    | <b>0.9593 ± 0.0025</b> | <b>0.9584 ± 0.0024</b> | <b>0.8840 ± 0.0299</b> | <b>0.8776 ± 0.0389</b> |                 |

Table 8: Fintuning Experiments with Linear Classifier on ACIDS dataset.

| Encoder   | Framework     | Label Ratio: 1.0 |                        | Label Ratio: 0.1       |                        | Label Ratio: 0.01      |                 |
|-----------|---------------|------------------|------------------------|------------------------|------------------------|------------------------|-----------------|
|           |               | Acc              | F1                     | Acc                    | F1                     | Acc                    | F1              |
| DeepSense | Supervised    | <b>0.9566</b>    | 0.8407                 | <b>0.9379 ± 0.0158</b> | 0.8006 ± 0.0316        | 0.7567 ± 0.0335        | 0.5754 ± 0.0406 |
|           | SimCLR        | 0.7438           | 0.6101                 | 0.7111 ± 0.0157        | 0.5773 ± 0.0166        | 0.6166 ± 0.0206        | 0.4392 ± 0.0430 |
|           | MoCo          | 0.7717           | 0.6205                 | 0.7433 ± 0.0269        | 0.5833 ± 0.0243        | 0.6637 ± 0.0414        | 0.4827 ± 0.0470 |
|           | CMC           | 0.8443           | 0.7244                 | 0.7370 ± 0.0126        | 0.6139 ± 0.0180        | 0.6313 ± 0.0633        | 0.4726 ± 0.0786 |
|           | MAE           | 0.6644           | 0.5618                 | 0.5862 ± 0.0024        | 0.4479 ± 0.0062        | 0.4901 ± 0.0309        | 0.2825 ± 0.0293 |
|           | Cosmo         | 0.8511           | 0.6929                 | 0.8532 ± 0.0176        | 0.7083 ± 0.0199        | 0.7288 ± 0.0231        | 0.5571 ± 0.0447 |
|           | Cocoa         | 0.6644           | 0.5359                 | 0.6174 ± 0.0106        | 0.4605 ± 0.0219        | 0.5617 ± 0.0223        | 0.3811 ± 0.0289 |
|           | MTSS          | 0.4352           | 0.2441                 | 0.4247 ± 0.0341        | 0.2130 ± 0.0385        | 0.4280 ± 0.0274        | 0.1879 ± 0.0333 |
|           | TS2Vec        | 0.5224           | 0.3587                 | 0.5299 ± 0.0121        | 0.3554 ± 0.0113        | 0.5341 ± 0.0363        | 0.3516 ± 0.0366 |
|           | GMC           | 0.9096           | 0.7929                 | 0.8890 ± 0.0090        | 0.7681 ± 0.0178        | 0.7156 ± 0.0603        | 0.5573 ± 0.0693 |
|           | TNC           | 0.8237           | 0.6936                 | 0.8063 ± 0.0156        | 0.6635 ± 0.0370        | 0.7428 ± 0.0419        | 0.5760 ± 0.0576 |
|           | TSTCC         | 0.7667           | 0.6164                 | 0.7655 ± 0.0094        | 0.6127 ± 0.0083        | 0.6697 ± 0.0354        | 0.4846 ± 0.0368 |
| FOCAL     | 0.9516        | <b>0.8580</b>    | 0.9253 ± 0.0143        | <b>0.8007 ± 0.0199</b> | <b>0.7829 ± 0.0448</b> | <b>0.5940 ± 0.0514</b> |                 |
| SW-T      | Supervised    | 0.9137           | 0.7770                 | 0.7310 ± 0.0224        | 0.5532 ± 0.0158        | 0.2666 ± 0.0319        | 0.1531 ± 0.0398 |
|           | SimCLR        | 0.9128           | 0.8144                 | 0.8882 ± 0.0154        | 0.7751 ± 0.0161        | 0.7580 ± 0.0380        | 0.6030 ± 0.0565 |
|           | MoCo          | 0.9174           | 0.8100                 | 0.9069 ± 0.0111        | 0.7841 ± 0.0192        | 0.7990 ± 0.0299        | 0.6235 ± 0.0408 |
|           | CMC           | 0.8128           | 0.6857                 | 0.7985 ± 0.0129        | 0.6700 ± 0.0170        | 0.6583 ± 0.0401        | 0.4990 ± 0.0422 |
|           | MAE           | 0.8516           | 0.7023                 | 0.7916 ± 0.0066        | 0.6344 ± 0.0088        | 0.4751 ± 0.0631        | 0.3440 ± 0.0317 |
|           | Cosmo         | 0.7110           | 0.6086                 | 0.6722 ± 0.0102        | 0.5279 ± 0.0067        | 0.5419 ± 0.0235        | 0.3710 ± 0.0114 |
|           | Cocoa         | 0.7096           | 0.5794                 | 0.6711 ± 0.0117        | 0.5324 ± 0.0127        | 0.6262 ± 0.0282        | 0.4585 ± 0.0212 |
|           | MTSS          | 0.3429           | 0.2250                 | 0.2878 ± 0.0292        | 0.1782 ± 0.0113        | 0.2946 ± 0.0499        | 0.1564 ± 0.0142 |
|           | TS2Vec        | 0.7183           | 0.5748                 | 0.6756 ± 0.0124        | 0.5003 ± 0.0119        | 0.5801 ± 0.0194        | 0.3837 ± 0.0153 |
|           | GMC           | 0.9402           | 0.7766                 | 0.9014 ± 0.0116        | 0.7278 ± 0.0148        | 0.7089 ± 0.0426        | 0.5250 ± 0.0401 |
|           | TNC           | 0.8352           | 0.7372                 | 0.8158 ± 0.0135        | 0.7051 ± 0.0176        | 0.6827 ± 0.0469        | 0.5424 ± 0.0500 |
|           | TSTCC         | 0.9041           | 0.7547                 | 0.9009 ± 0.0062        | 0.7449 ± 0.0202        | 0.7656 ± 0.0378        | 0.5806 ± 0.0223 |
| FOCAL     | <b>0.9489</b> | <b>0.8262</b>    | <b>0.9400 ± 0.0081</b> | <b>0.7975 ± 0.0199</b> | <b>0.8669 ± 0.0287</b> | <b>0.6844 ± 0.0372</b> |                 |

869 baselines, FOCAL still demonstrates its superiority in KNN classification. Between the two encoders  
870 on FOCAL, SW-T outperforms DeepSense in three out of four datasets, which further shows the  
871 benefits FOCAL brings to SW-T training.



Table 9: Fintuning Experiments with Linear Classifier on RealWorld-HAR dataset.

| Encoder   | Framework  | Label Ratio: 1.0 |               | Label Ratio: 0.1       |                        | Label Ratio: 0.01      |                        |
|-----------|------------|------------------|---------------|------------------------|------------------------|------------------------|------------------------|
|           |            | Acc              | F1            | Acc                    | F1                     | Acc                    | F1                     |
| DeepSense | Supervised | 0.9348           | <b>0.9388</b> | 0.9256 ± 0.0056        | <b>0.9233 ± 0.0104</b> | 0.7305 ± 0.0270        | 0.6158 ± 0.0341        |
|           | SimCLR     | 0.7138           | 0.6841        | 0.6597 ± 0.0182        | 0.6126 ± 0.0198        | 0.5334 ± 0.0566        | 0.4271 ± 0.0518        |
|           | MoCo       | 0.7859           | 0.7708        | 0.7454 ± 0.0206        | 0.6687 ± 0.0340        | 0.5110 ± 0.0409        | 0.4018 ± 0.0552        |
|           | CMC        | 0.7975           | 0.8116        | 0.7482 ± 0.0328        | 0.7590 ± 0.0282        | 0.5169 ± 0.0314        | 0.4716 ± 0.0455        |
|           | MAE        | 0.7565           | 0.7515        | 0.7206 ± 0.0181        | 0.7056 ± 0.0175        | 0.5556 ± 0.0527        | 0.4593 ± 0.0541        |
|           | Cosmo      | 0.8956           | 0.8888        | 0.8814 ± 0.0123        | 0.8626 ± 0.0338        | 0.8434 ± 0.0376        | 0.7775 ± 0.0801        |
|           | Cocoa      | 0.8465           | 0.8488        | 0.8492 ± 0.0070        | 0.8211 ± 0.0068        | 0.7155 ± 0.0397        | 0.6381 ± 0.0324        |
|           | MTSS       | 0.2989           | 0.1405        | 0.1905 ± 0.0503        | 0.0692 ± 0.0328        | 0.1698 ± 0.0365        | 0.0600 ± 0.0355        |
|           | TS2Vec     | 0.6595           | 0.5984        | 0.6419 ± 0.0189        | 0.5721 ± 0.0154        | 0.6147 ± 0.0456        | 0.5197 ± 0.0241        |
|           | GMC        | 0.8869           | 0.8948        | 0.8872 ± 0.0172        | 0.8842 ± 0.0124        | 0.7954 ± 0.0367        | 0.7620 ± 0.0442        |
|           | TNC        | 0.8892           | 0.8971        | 0.8712 ± 0.0238        | 0.8629 ± 0.0260        | 0.7991 ± 0.0390        | 0.7337 ± 0.0229        |
|           | TSTCC      | 0.8073           | 0.8010        | 0.7892 ± 0.0146        | 0.7625 ± 0.0223        | 0.7213 ± 0.0320        | 0.6181 ± 0.0352        |
|           | FOCAL      | <b>0.9382</b>    | 0.9290        | <b>0.9335 ± 0.0053</b> | 0.9224 ± 0.0075        | <b>0.8518 ± 0.0274</b> | <b>0.7933 ± 0.0436</b> |
| SW-T      | Supervised | 0.9313           | 0.9278        | 0.7264 ± 0.0411        | 0.6090 ± 0.0447        | 0.4541 ± 0.0694        | 0.2771 ± 0.0798        |
|           | SimCLR     | 0.7046           | 0.7220        | 0.6717 ± 0.0062        | 0.6892 ± 0.0081        | 0.4867 ± 0.0431        | 0.4267 ± 0.0674        |
|           | MoCo       | 0.7813           | 0.8024        | 0.7324 ± 0.0096        | 0.7425 ± 0.0173        | 0.5541 ± 0.0462        | 0.4823 ± 0.0391        |
|           | CMC        | 0.8840           | 0.8955        | 0.8352 ± 0.0154        | 0.8424 ± 0.0156        | 0.5602 ± 0.0411        | 0.5245 ± 0.0549        |
|           | MAE        | 0.8829           | 0.8813        | 0.7873 ± 0.0100        | 0.7224 ± 0.0314        | 0.5602 ± 0.0275        | 0.4699 ± 0.0205        |
|           | Cosmo      | 0.8604           | 0.8169        | 0.7710 ± 0.0134        | 0.6899 ± 0.0178        | 0.6089 ± 0.0256        | 0.5230 ± 0.0395        |
|           | Cocoa      | 0.8892           | 0.8861        | 0.8609 ± 0.0110        | 0.8501 ± 0.0143        | 0.7430 ± 0.0321        | 0.6657 ± 0.0432        |
|           | MTSS       | 0.5136           | 0.4370        | 0.4359 ± 0.0281        | 0.3690 ± 0.0303        | 0.3547 ± 0.0156        | 0.2792 ± 0.0202        |
|           | TS2Vec     | 0.6151           | 0.5955        | 0.6074 ± 0.0202        | 0.5540 ± 0.0201        | 0.5667 ± 0.0451        | 0.4876 ± 0.0464        |
|           | GMC        | 0.9319           | 0.9379        | 0.9081 ± 0.0108        | 0.9115 ± 0.0092        | 0.7925 ± 0.0426        | 0.7453 ± 0.0581        |
|           | TNC        | 0.8817           | 0.8784        | 0.8635 ± 0.0109        | 0.8525 ± 0.0100        | 0.8061 ± 0.0215        | 0.7494 ± 0.0452        |
|           | TSTCC      | 0.8731           | 0.8454        | 0.8606 ± 0.0114        | 0.8070 ± 0.0233        | 0.7374 ± 0.0434        | 0.6685 ± 0.0642        |
|           | FOCAL      | <b>0.9452</b>    | <b>0.9492</b> | <b>0.9370 ± 0.0069</b> | <b>0.9421 ± 0.0060</b> | <b>0.8301 ± 0.0428</b> | <b>0.7519 ± 0.0578</b> |

Table 10: Fintuning Experiments with Linear Classifier on PAMAP2 dataset.

| Encoder   | Framework  | Label Ratio: 1.0 |               | Label Ratio: 0.1       |                        | Label Ratio: 0.01      |                        |
|-----------|------------|------------------|---------------|------------------------|------------------------|------------------------|------------------------|
|           |            | Acc              | F1            | Acc                    | F1                     | Acc                    | F1                     |
| DeepSense | Supervised | <b>0.8849</b>    | <b>0.8761</b> | 0.8080 ± 0.0071        | 0.7649 ± 0.0275        | 0.6539 ± 0.0303        | 0.5695 ± 0.0726        |
|           | SimCLR     | 0.6802           | 0.6583        | 0.6132 ± 0.0174        | 0.5606 ± 0.0247        | 0.4352 ± 0.0340        | 0.3305 ± 0.0197        |
|           | MoCo       | 0.7559           | 0.7387        | 0.6325 ± 0.0177        | 0.5601 ± 0.0401        | 0.3872 ± 0.0301        | 0.2873 ± 0.0274        |
|           | CMC        | 0.7906           | 0.7706        | 0.6687 ± 0.0263        | 0.5653 ± 0.0602        | 0.2724 ± 0.0287        | 0.1676 ± 0.0248        |
|           | MAE        | 0.7114           | 0.6158        | 0.5769 ± 0.0222        | 0.4514 ± 0.0239        | 0.2734 ± 0.0192        | 0.1096 ± 0.0198        |
|           | Cosmo      | 0.8356           | 0.8135        | 0.7790 ± 0.0220        | 0.7427 ± 0.0341        | 0.6782 ± 0.0226        | 0.5740 ± 0.0293        |
|           | Cocoa      | 0.7603           | 0.7187        | 0.7132 ± 0.0105        | 0.6432 ± 0.0082        | 0.5922 ± 0.0234        | 0.5293 ± 0.0232        |
|           | MTSS       | 0.3541           | 0.1795        | 0.2891 ± 0.0416        | 0.1169 ± 0.0378        | 0.1857 ± 0.0546        | 0.0710 ± 0.0406        |
|           | TS2Vec     | 0.5729           | 0.4715        | 0.5416 ± 0.0171        | 0.4433 ± 0.0177        | 0.4399 ± 0.0341        | 0.3335 ± 0.0445        |
|           | GMC        | 0.8119           | 0.7860        | 0.7528 ± 0.0097        | 0.6975 ± 0.0207        | 0.5837 ± 0.0367        | 0.4899 ± 0.0510        |
|           | TNC        | 0.8387           | 0.8143        | 0.8287 ± 0.0022        | 0.8068 ± 0.0059        | 0.7365 ± 0.0414        | 0.6469 ± 0.0682        |
|           | TSTCC      | 0.7776           | 0.7250        | 0.7489 ± 0.0105        | 0.6401 ± 0.0201        | 0.5348 ± 0.0782        | 0.4368 ± 0.0852        |
|           | FOCAL      | 0.8604           | 0.8463        | <b>0.8373 ± 0.0041</b> | <b>0.8175 ± 0.0074</b> | <b>0.7521 ± 0.0151</b> | <b>0.6900 ± 0.0325</b> |
| SW-T      | Supervised | <b>0.8612</b>    | <b>0.8384</b> | 0.7295 ± 0.0135        | 0.6434 ± 0.0230        | 0.4048 ± 0.0337        | 0.3159 ± 0.0271        |
|           | SimCLR     | 0.7705           | 0.7424        | 0.7307 ± 0.0060        | 0.6871 ± 0.0103        | 0.5416 ± 0.0441        | 0.4708 ± 0.0627        |
|           | MoCo       | 0.7717           | 0.7313        | 0.7112 ± 0.0203        | 0.6356 ± 0.0331        | 0.4774 ± 0.0220        | 0.3740 ± 0.0301        |
|           | CMC        | 0.8080           | 0.7901        | 0.6864 ± 0.0259        | 0.4590 ± 0.0131        | 0.1852 ± 0.0221        | 0.1283 ± 0.0127        |
|           | MAE        | 0.7910           | 0.7606        | 0.6655 ± 0.0067        | 0.6028 ± 0.0129        | 0.3603 ± 0.0416        | 0.2866 ± 0.0402        |
|           | Cosmo      | 0.7741           | 0.7366        | 0.6702 ± 0.0051        | 0.5958 ± 0.0107        | 0.4555 ± 0.0381        | 0.3870 ± 0.0297        |
|           | Cocoa      | 0.7689           | 0.7317        | 0.7461 ± 0.0047        | 0.7048 ± 0.0115        | 0.6594 ± 0.0228        | 0.5973 ± 0.0243        |
|           | MTSS       | 0.2847           | 0.1714        | 0.2558 ± 0.0109        | 0.1585 ± 0.0097        | 0.2133 ± 0.0164        | 0.1265 ± 0.0215        |
|           | TS2Vec     | 0.6195           | 0.5426        | 0.6001 ± 0.0133        | 0.5249 ± 0.0154        | 0.5051 ± 0.0402        | 0.4123 ± 0.0374        |
|           | GMC        | 0.8312           | 0.8083        | 0.7686 ± 0.0118        | 0.7297 ± 0.0140        | 0.5704 ± 0.0409        | 0.4965 ± 0.0426        |
|           | TNC        | 0.8013           | 0.7506        | 0.7921 ± 0.0083        | 0.7380 ± 0.0144        | 0.7222 ± 0.0305        | 0.6378 ± 0.0488        |
|           | TSTCC      | 0.7997           | 0.7260        | 0.7800 ± 0.0094        | 0.6890 ± 0.0148        | 0.6438 ± 0.0569        | 0.5566 ± 0.0509        |
|           | FOCAL      | 0.8442           | 0.8287        | <b>0.8179 ± 0.0117</b> | <b>0.7856 ± 0.0177</b> | <b>0.7371 ± 0.0332</b> | <b>0.6630 ± 0.0410</b> |

872 **F.3 Complete Clustering Results**

873 **Setup:** We further evaluate the clustering performance of FOCAL with other multimodal self-  
874 supervised learning baselines, including CMC, Cosmo, Cocoa, and GMC. We apply K-means  
875 clustering to the encoded embeddings from each framework, by setting the number of clusters equal

Table 11: Complete KNN Results

| Encoders  | Framework    | MOD           |               | ACIDS         |               | RealWorld-HAR |               | PAMAP2        |               |
|-----------|--------------|---------------|---------------|---------------|---------------|---------------|---------------|---------------|---------------|
|           |              | Acc           | F1            | Acc           | F1            | Acc           | F1            | Acc           | F1            |
| DeepSense | SimCLR       | 0.8238        | 0.8240        | 0.7402        | 0.5637        | 0.6584        | 0.6234        | 0.6451        | 0.6114        |
|           | MoCo         | 0.8446        | 0.8444        | 0.7735        | 0.5957        | 0.7496        | 0.7134        | 0.6924        | 0.6766        |
|           | CMC          | 0.9002        | 0.8989        | 0.7584        | 0.6516        | 0.5216        | 0.5868        | 0.8032        | 0.7938        |
|           | MAE          | 0.6470        | 0.6451        | 0.7457        | 0.5610        | <b>0.8794</b> | <b>0.8817</b> | 0.6857        | 0.6427        |
|           | Cosmo        | 0.8379        | 0.8387        | 0.7986        | 0.6284        | 0.8102        | 0.7817        | 0.8005        | 0.7743        |
|           | Cocoa        | 0.7910        | 0.7877        | 0.6758        | 0.4966        | 0.7778        | 0.7459        | 0.7129        | 0.6974        |
|           | MTSS         | 0.3443        | 0.3249        | 0.4333        | 0.2417        | 0.5101        | 0.4384        | 0.3931        | 0.3379        |
|           | TS2Vec       | 0.6966        | 0.6875        | 0.5726        | 0.3602        | 0.6480        | 0.5832        | 0.5639        | 0.5180        |
|           | GMC          | 0.8533        | 0.8526        | 0.7411        | 0.6210        | 0.7415        | 0.7560        | 0.7843        | 0.7543        |
|           | TNC          | 0.9498        | 0.9508        | 0.7813        | 0.6203        | 0.7882        | 0.7565        | 0.7993        | 0.7653        |
|           | TSTCC        | 0.8607        | 0.8615        | 0.8192        | 0.6443        | 0.7686        | 0.7658        | 0.8032        | 0.7896        |
|           | <b>FOCAL</b> | <b>0.9551</b> | <b>0.9544</b> | <b>0.9247</b> | <b>0.7938</b> | 0.8205        | 0.8254        | <b>0.8482</b> | <b>0.8378</b> |
| SW-T      | SimCLR       | 0.9022        | 0.9021        | 0.8553        | 0.7086        | 0.6532        | 0.6767        | 0.7441        | 0.7178        |
|           | MoCo         | 0.9344        | 0.9343        | 0.8311        | 0.6943        | 0.7103        | 0.7303        | 0.7082        | 0.6678        |
|           | CMC          | 0.8305        | 0.8261        | 0.7187        | 0.6355        | 0.5701        | 0.6007        | 0.7709        | 0.7694        |
|           | MAE          | 0.3389        | 0.3104        | 0.5945        | 0.4194        | 0.6428        | 0.6080        | 0.5517        | 0.4969        |
|           | Cosmo        | 0.2786        | 0.2621        | 0.5790        | 0.4573        | 0.7086        | 0.6389        | 0.6672        | 0.5874        |
|           | Cocoa        | 0.5941        | 0.5793        | 0.5311        | 0.4261        | 0.7421        | 0.7496        | 0.7188        | 0.7070        |
|           | MTSS         | 0.3423        | 0.3376        | 0.3151        | 0.1890        | 0.4882        | 0.4431        | 0.2007        | 0.1649        |
|           | TS2Vec       | 0.5847        | 0.5718        | 0.6050        | 0.4144        | 0.5580        | 0.5335        | 0.5623        | 0.5040        |
|           | GMC          | 0.5318        | 0.5180        | 0.7589        | 0.6150        | 0.7380        | 0.7455        | 0.7567        | 0.7401        |
|           | TNC          | 0.8265        | 0.8263        | 0.7795        | 0.6725        | 0.8009        | 0.7817        | 0.7674        | 0.7189        |
|           | TSTCC        | 0.8607        | 0.8613        | 0.8356        | 0.6700        | 0.7582        | 0.7512        | 0.7780        | 0.7369        |
|           | <b>FOCAL</b> | <b>0.9665</b> | <b>0.9664</b> | <b>0.8826</b> | <b>0.7643</b> | <b>0.8586</b> | <b>0.8665</b> | <b>0.8549</b> | <b>0.8484</b> |

Table 12: Clustering Evaluation

| Dataset   |              | MOD                    |                        | ACIDS                  |                        | RealWorld-HAR          |                        | PAMAP2                 |                        |
|-----------|--------------|------------------------|------------------------|------------------------|------------------------|------------------------|------------------------|------------------------|------------------------|
| Encoder   | Framework    | ARI                    | NMI                    | ARI                    | NMI                    | ARI                    | NMI                    | ARI                    | NMI                    |
| DeepSense | CMC          | <b>0.3936 ± 0.0125</b> | <b>0.5224 ± 0.0206</b> | 0.2926 ± 0.0156        | 0.5833 ± 0.0051        | 0.2187 ± 0.1094        | 0.4354 ± 0.1713        | 0.3024 ± 0.0118        | 0.5063 ± 0.0120        |
|           | Cosmo        | 0.1384 ± 0.0540        | 0.2552 ± 0.0803        | 0.5217 ± 0.0074        | 0.6416 ± 0.0184        | 0.4231 ± 0.2726        | 0.5318 ± 0.2564        | 0.3583 ± 0.0781        | 0.5212 ± 0.0671        |
|           | Cocoa        | 0.3502 ± 0.0184        | 0.4444 ± 0.0135        | 0.5453 ± 0.0229        | 0.6767 ± 0.0184        | 0.3385 ± 0.1826        | 0.4792 ± 0.1940        | 0.3493 ± 0.0230        | 0.5091 ± 0.0184        |
|           | GMC          | 0.1982 ± 0.0674        | 0.3925 ± 0.0416        | 0.2490 ± 0.0403        | 0.5296 ± 0.0150        | 0.3433 ± 0.1836        | 0.4794 ± 0.1978        | 0.3078 ± 0.0194        | 0.5092 ± 0.0221        |
|           | <b>FOCAL</b> | 0.3929 ± 0.0222        | 0.5067 ± 0.0226        | <b>0.5723 ± 0.0440</b> | <b>0.7213 ± 0.0432</b> | <b>0.4400 ± 0.2465</b> | <b>0.5545 ± 0.2437</b> | <b>0.4759 ± 0.0695</b> | <b>0.6037 ± 0.0558</b> |
| SW-T      | CMC          | 0.4314 ± 0.2716        | 0.5413 ± 0.2612        | 0.3604 ± 0.0119        | 0.5881 ± 0.0009        | 0.4014 ± 0.0528        | 0.5275 ± 0.0532        | 0.3718 ± 0.0480        | 0.5562 ± 0.0401        |
|           | Cosmo        | 0.2865 ± 0.1521        | 0.4140 ± 0.1946        | 0.4436 ± 0.0145        | 0.5469 ± 0.0015        | 0.0029 ± 0.0020        | 0.0107 ± 0.0025        | 0.2425 ± 0.0301        | 0.3604 ± 0.0347        |
|           | Cocoa        | 0.4281 ± 0.2314        | 0.5308 ± 0.2405        | 0.4363 ± 0.0020        | 0.6824 ± 0.0261        | 0.2487 ± 0.0053        | 0.3897 ± 0.0024        | 0.3658 ± 0.0540        | 0.5330 ± 0.0472        |
|           | GMC          | 0.3973 ± 0.2177        | 0.4940 ± 0.2184        | 0.2055 ± 0.0029        | 0.4971 ± 0.0066        | 0.3050 ± 0.0076        | 0.4342 ± 0.0052        | 0.2794 ± 0.0206        | 0.5044 ± 0.0329        |
|           | <b>FOCAL</b> | <b>0.4660 ± 0.2737</b> | <b>0.5693 ± 0.2579</b> | <b>0.6050 ± 0.1027</b> | <b>0.7389 ± 0.0774</b> | <b>0.4319 ± 0.0851</b> | <b>0.5462 ± 0.0717</b> | <b>0.4785 ± 0.0914</b> | <b>0.6130 ± 0.0730</b> |

876 to the number of unique classes in the testing dataset. As mentioned before, the preferred cluster  
877 structure by the SSL frameworks should align well with the underlying ground-truth labels in addition  
878 to presenting clear separation among the clusters. Following this objective, we quantitatively assess  
879 the clustering performance by independently calculating the Adjusted Rand Index (ARI) and the  
880 Normalized Mutual Information (NMI) of each modality to provide an accurate comparison of the  
881 alignment between the pretrained clusters and ground-truth classes. ARI evaluates the similarity  
882 between the clustering assignments generated by the K-means clusters and the label distribution of  
883 the test data. With a value range of -1 to 1, ARI indicates a high degree of agreement between the  
884 two clusterings when close to 1, random agreement when close to zero, and a clustering performance  
885 worse than random when approaching -1. NMI serves as an external metric for measuring the  
886 clustering quality. A score close to 1 indicates a perfect correlation between the clusterings, and a  
887 score of 0 demonstrates no mutual information between the clusters. Lastly, we performed t-SNE to  
888 qualitatively visualize the sample embeddings after concatenating the modality embeddings.

889 **Analysis:** In Table 12, we present the clustering results with the average and standard deviation of  
890 ARI and NMI across all modalities. As the results show, FOCAL consistently achieves the highest or  
891 similar ARI scores in comparison to other multimodal contrastive frameworks. When using SW-T  
892 as the encoder, FOCAL outperforms the strongest baseline by an average ARI margin of 8.33%  
893 and an average NMI margin of 4%. With DeepSense as the encoder, FOCAL surpasses the best  
894 baseline by an average ARI margin of 4.61% and an average NMI margin of 3.35%. Although  
895 CMC exhibits comparable performance for the MOD dataset when using DeepSense as an encoder,  
896 FOCAL with DeepSense exceeds CMC by an average of 16.8% and 8.47% in ARI and NMI across  
897 the four datasets. These results confirm our claim that FOCAL produces higher quality modality  
898 representations compared to the baseline multi-modal contrastive frameworks. We also found the  
899 general ARI and NMI values are relatively low because there could be multiple perspectives affecting

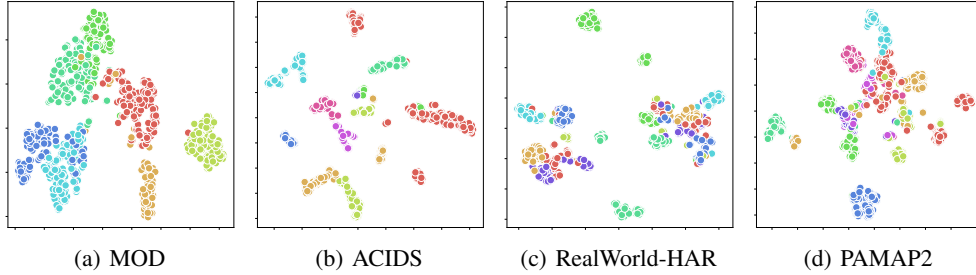

Figure 9: t-SNE visualization of the concatenated modality features in FOCAL. We use DeepSense as the backbone encoder.

Table 13: Linear Finetune Results with Extended Tasks on MOD

| Task    | Distance Classification |               |               |               |               |               | Speed Classification |               |               |               |               |               |
|---------|-------------------------|---------------|---------------|---------------|---------------|---------------|----------------------|---------------|---------------|---------------|---------------|---------------|
|         | SW-T                    |               |               | DeepSense     |               |               | SW-T                 |               |               | DeepSense     |               |               |
| Encoder | Acc                     | F1            | Corr Acc      | Acc           | F1            | Corr Acc      | Acc                  | F1            | Corr Acc      | Acc           | F1            | Corr Acc      |
| SimCLR  | 0.9090                  | 0.8694        | 0.9545        | 0.8787        | 0.8057        | 0.9242        | 0.5511               | 0.5514        | 0.7524        | 0.5596        | 0.5438        | 0.7751        |
| MoCo    | 0.9090                  | 0.8694        | 0.9545        | 0.8484        | 0.7374        | 0.9091        | 0.6108               | 0.6105        | 0.7879        | 0.5767        | 0.5655        | 0.7794        |
| CMC     | 0.8180                  | 0.7507        | 0.8636        | <b>0.9393</b> | 0.8181        | <b>0.9697</b> | 0.5170               | 0.5175        | 0.7268        | 0.6022        | 0.6016        | 0.7850        |
| MAE     | 0.7272                  | 0.4917        | 0.8333        | 0.7272        | 0.4969        | 0.8030        | 0.4545               | 0.4383        | 0.6932        | 0.4034        | 0.3929        | 0.6506        |
| Cosmo   | 0.6363                  | 0.2592        | 0.8182        | <b>0.9393</b> | 0.8730        | 0.9545        | 0.2926               | 0.2779        | 0.5459        | 0.5681        | 0.5566        | 0.7737        |
| Cocoa   | 0.8181                  | 0.6898        | 0.8939        | 0.8181        | 0.6966        | 0.8333        | 0.4005               | 0.3618        | 0.6851        | 0.5625        | 0.5580        | 0.7628        |
| MTSS    | 0.7272                  | 0.4832        | 0.8030        | 0.8787        | 0.6180        | 0.9394        | 0.3522               | 0.2711        | 0.6544        | 0.4005        | 0.3482        | 0.6856        |
| TS2Vec  | 0.6969                  | 0.5869        | 0.7879        | 0.9090        | 0.8469        | 0.9242        | 0.4517               | 0.4473        | 0.6799        | 0.5198        | 0.5073        | 0.7476        |
| GMC     | 0.8181                  | 0.7450        | 0.8788        | 0.8484        | 0.7956        | 0.8788        | 0.4460               | 0.4405        | 0.6856        | 0.6250        | 0.6232        | 0.7917        |
| TNC     | 0.8484                  | 0.8015        | 0.8788        | 0.8787        | 0.8169        | 0.9242        | 0.4375               | 0.4322        | 0.6643        | 0.6108        | 0.6077        | 0.7841        |
| TS-TCC  | 0.7878                  | 0.6575        | 0.8939        | 0.8484        | 0.7312        | 0.9242        | 0.5284               | 0.5230        | 0.7311        | 0.5255        | 0.5138        | 0.7486        |
| FOCAL   | <b>0.9697</b>           | <b>0.9726</b> | <b>0.9848</b> | <b>0.9393</b> | <b>0.8985</b> | <b>0.9697</b> | <b>0.6960</b>        | <b>0.6920</b> | <b>0.8329</b> | <b>0.6647</b> | <b>0.6682</b> | <b>0.8234</b> |

900 the cluster structures that lead to complicated underlying semantics while we only evaluate one  
 901 perspective among them.

902 Figures 6 and 9 represent the t-SNE visualizations of the encoded sample embeddings. We can  
 903 observe a clear separation between individual clusters on MOD, ACIDS, and RealWorld-HAR,  
 904 indicating that FOCAL effectively captures the distinct characteristics of each class. However, for  
 905 the PAMAP2 dataset, we notice various overlaps between different embeddings. This observation  
 906 suggests that the underlying structure of the PAMAP2 dataset is more challenging to differentiate  
 907 compared to other datasets, potentially due to similarities among a large number of classes with 18  
 908 different physical activities. This discovery is also consistent with our linear probing results, which  
 909 perform slightly worse on the PAMAP2 dataset.

#### 910 F.4 Complete Additional Downstream Task Results

911 **Setup:** We collected additional data samples for the MOD dataset and finetuned our pretrained  
 912 models from previous experiments. Specifically, we evaluated our pretrained models by finetuning  
 913 the classifier layer on two downstream tasks, distance classification, and speed classification tasks,  
 914 with data obtained from different environments and new types of vehicles. These alterations in the  
 915 data lead to domain adaptation, referring to changes in the data’s distribution. For speed classification,  
 916 the classifier predicts the speed of the moving object between 5, 10, 15, and 20 mph. For distance  
 917 classification, the classifier outputs whether the detected object is close, near, or far away.

918 Three metrics are evaluated in this experiment. In addition to the normal accuracy and (macro)  
 919 F1 score, we also define a new metric called *correlated accuracy*. It considers the semantical  
 920 distances between different classes and assigns different penalties to different misclassifications cases.  
 921 Intuitively, for a sample with ground truth speed 5, a misclassification of speed 20 should be assigned  
 922 more penalty than a misclassification of speed 10. Given a sample label pair  $(x_i^s, y_i^s)$ , the predicted  
 923 label  $y_i$ , and the number of classes  $C$ , we define the maximum class distance as  $\max(i, C - i - 1)$ ,  
 924 then the correlated accuracy is calculated by

$$corr\_acc = \frac{1}{N'} \sum_i \left( 1 - \frac{|y_i - y_i^s|}{\max(i, C - i - 1)} \right), \quad (6)$$

Table 14: Ablation Results with DeepSense Encoder and Linear Classifier

| Metrics         | MOD           |               | ACIDS         |               | RealWorld-HAR |               | PAMAP2        |               |
|-----------------|---------------|---------------|---------------|---------------|---------------|---------------|---------------|---------------|
|                 | Acc           | F1            | Acc           | F1            | Acc           | F1            | Acc           | F1            |
| FOCAL-noPrivate | 0.939         | 0.938         | 0.8803        | 0.7229        | 0.8742        | 0.843         | 0.8146        | 0.8017        |
| FOCAL-noOrth    | 0.9691        | 0.9688        | 0.9068        | 0.8218        | 0.9061        | 0.8967        | 0.828         | 0.7957        |
| FOCAL-wDistInd  | 0.9223        | 0.9223        | 0.9493        | 0.8347        | 0.9438        | 0.9287        | 0.7921        | 0.7344        |
| FOCAL-noTemp    | 0.9557        | 0.9551        | 0.9461        | 0.872         | 0.9319        | 0.9237        | 0.8414        | 0.8162        |
| FOCAL-wTempCon  | 0.9564        | 0.956         | 0.9255        | 0.8124        | 0.9353        | 0.9141        | 0.8497        | 0.8131        |
| FOCAL           | <b>0.9732</b> | <b>0.9729</b> | <b>0.9516</b> | <b>0.8580</b> | <b>0.9382</b> | <b>0.9290</b> | <b>0.8588</b> | <b>0.8463</b> |

925 where the penalty of misclassification is linearly interpolated according to the distance of the predicted  
 926 label and the ground truth label, divided by the maximum distance to this class. The value range of  
 927 the correlated accuracy is still  $[0, 1]$ , where 0 means the worst and 1 means the best.

928 **Analysis:** We observe a significant drop in performance on most of the self-supervised learning  
 929 frameworks on speed classification. When using SW-T as the encoder, FOCAL still dominates the  
 930 performance over other baselines, exceeding the strongest baseline by 6.07% accuracy and 10.32 %  
 931 F1 score. When using DeepSense as the encoder, FOCAL also achieves comparable high performance  
 932 as the current baselines. The advantage of FOCAL persists in the correlated accuracy metric where  
 933 the physical correlations among classes are counted. Considering the heterogeneous finetune tasks,  
 934 the potential domain shift, and the leading performance, we conclude that FOCAL is promising in  
 935 learning fundamental feature patterns from multi-modal sensing data that could serve an extensive set  
 936 of downstream tasks.

937 **F.5 Ablation Study Results**

938 **Steup:** We first briefly introduce the compared variants of FOCAL in our ablation study. In these  
 939 variants, they are set up in the same way as FOCAL except for the places we explain below.

- 940 • **FOCAL-noPrivate:** We remove the private modality space and its related contrastive task  
 941 but only apply the cross-modal matching task.
- 942 • **FOCAL-noOrth:** We keep the private modality space, but do not enforce the orthogonality  
 943 constraint between the shared feature and private feature of the same modality, and the  
 944 private features between pairs of modalities.
- 945 • **FOCAL-wDistInd:** We replace the geometrical orthogonality constraint with statistical  
 946 independence between modality embedding distributions. Specifically, we follow the  
 947 approach proposed in [8] to disentangle the distribution of latent subspaces, which minimizes  
 948 the mutual information between shared-private spaces of the same modality and private-  
 949 private spaces between two modalities. Given two embedding distributions, it minimizes the  
 950 KL divergence between their joint distribution and the product of two marginal distributions.  
 951 Following the density-ratio trick, we train a classifier consisting of several fully-connected  
 952 layers to discriminate samples from the originally matched pairs of embeddings and the  
 953 randomly selected embedding pairs, which has been shown to approximate the density ratio  
 954 needed to estimate the KL divergence within sample batches. Similar to GAN [5], we train  
 955 the discriminator alternatively with modality encoders until convergence.
- 956 • **FOCAL-noTemp:** We remove the temporal structural constraint proposed in FOCAL.
- 957 • **FOCAL-wTempCon:** We replace the temporal structural constraint with a temporal con-  
 958 trastive task. Given a modality, we regard close sample pairs within a short sequence as  
 959 positive samples and regard distant sample pairs from different short sequences as negative  
 960 samples, and conduct discrimination between positive samples and negative samples.

961 **Analysis:** The complete ablation results on DeepSense encoder are presented in Table 14. Similar  
 962 to our observations with SW-T encoder, all of the three components introduced in FOCAL (private  
 963 space, orthogonality constraint, and temporal constraint) contribute positively to the downstream  
 964 performance. However, we do find the orthogonality constraint and the temporal constraint play a  
 965 more important role in the performance improvement with the DeepSense encoder than that with  
 966 SW-T encoder on ACIDS, RealWorld-HAR, and PAMAP2 datasets. Besides, it is noticeable that  
 967 distributional independence contributes positively to FOCAL on ACIDS and RealWorld-HAR datasets  
 968 but contributes negatively to FOCAL on MOD and PAMAP2 datasets. We leave it as future work to

969 investigate more into the role of distributional independence in factorizing the latent space within the  
970 multimodal contrastive learning paradigm.

## 971 **G Limitations and Potential Extensions**

972 **Assumption on Modality Synchronization:** We assume the signals simultaneously arrived at all  
973 sensory modalities such that the information at different modalities is synchronized. However, in  
974 some scenarios, different signals propagate at significantly different speeds. For instance, light travels  
975 much faster than sound. The shared modality embeddings can not be directly matched for the same  
976 samples without signal synchronizations between the modalities.

977 **Computational Complexity of Pretraining Loss:** In the current design, we take all pairs of  
978 modalities to compute their shared space consistency loss and private space orthogonality loss, which  
979 leads to  $O(K^2)$  complexity to the number of modalities  $K$ . On one hand, we assume the modality  
980 number is limited to a handful count in most sensing applications; on the hand, we leave it as one of  
981 our future work to reduce the computational complexity in pretraining loss calculation.

982 **Dependency on Data Augmentations:** Our current contrastive learning paradigm is still not fully  
983 self-supervised, because we need to design a set of transformations (*i.e.*, data augmentations) for  
984 the private modality feature learning. However, different from image data, designing proper label-  
985 invariant data augmentations for time-series data can be challenging in some applications, especially  
986 when we do not have knowledge about the potential downstream tasks. One potential solution  
987 is to integrate the masked reconstruction learning paradigm into the framework, such that data  
988 augmentations can be avoided or less depended on.

989 **Multi-Device Collaboration:** This paper focused on multi-modal collaborative sensing settings  
990 while multi-device collaboration is not fully considered. The general design of contrastive learning in  
991 factorized latent space is extensible to the multi-device setting, but more designs need to be introduced  
992 to further address the heterogeneity contained in different vantage points and the scalability issues  
993 related to the number of participating sensor nodes in large-scale distributed sensing scenarios.

994 **Resiliency Against Domain Shift:** Although FOCAL improves the downstream performance of  
995 contrastive learning from multimodal sensing signals, it still exhibits relatively low accuracy in speed  
996 classification when data is collected from a different environment. There are multiple environmental  
997 factors that can lead to such degradations, including terrain, wind, sensor facing directions. We  
998 hope to integrate domain-invariant considerations into the learning objective in the future such that  
999 apparently task-unrelated information is decoupled and removed from the pretrained embedding  
1000 space, and the model resiliency can be significantly enhanced.

## 1001 **References**

- 1002 [1] Ting Chen, Simon Kornblith, Mohammad Norouzi, and Geoffrey Hinton. A simple framework  
1003 for contrastive learning of visual representations. In *International Conference on Machine*  
1004 *Learning*, pages 1597–1607, 2020.
- 1005 [2] Xinlei Chen, Saining Xie, and Kaiming He. An empirical study of training self-supervised  
1006 vision transformers. In *Proceedings of the IEEE/CVF International Conference on Computer*  
1007 *Vision*, pages 9640–9649, 2021.
- 1008 [3] Shohreh Deldari, Hao Xue, Aaqib Saeed, Daniel V. Smith, and Flora D. Salim. Cocoa: Cross  
1009 modality contrastive learning for sensor data. *Proc. ACM Interact. Mob. Wearable Ubiquitous*  
1010 *Technol.*, 6(3), 2022.
- 1011 [4] Emadeldeen Eldele, Mohamed Ragab, Zhenghua Chen, Min Wu, Chee Keong Kwoh, Xiaoli  
1012 Li, and Cuntai Guan. Self-supervised contrastive representation learning for semi-supervised  
1013 time-series classification. *arXiv preprint arXiv:2208.06616*, 2022.
- 1014 [5] Ian Goodfellow, Jean Pouget-Abadie, Mehdi Mirza, Bing Xu, David Warde-Farley, Sherjil  
1015 Ozair, Aaron Courville, and Yoshua Bengio. Generative adversarial nets. In *Advances in Neural*  
1016 *Information Processing Systems*, volume 27, 2014.

- 1017 [6] Kaiming He, Xinlei Chen, Saining Xie, Yanghao Li, Piotr Dollár, and Ross Girshick. Masked  
1018 autoencoders are scalable vision learners. In *Proceedings of the IEEE/CVF Conference on*  
1019 *Computer Vision and Pattern Recognition*, pages 16000–16009, 2022.
- 1020 [7] Bulat Khaertdinov, Esam Ghaleb, and Stylianos Asteriadis. Contrastive self-supervised learning  
1021 for sensor-based human activity recognition. In *IEEE International Joint Conference on*  
1022 *Biometrics (IJCB)*, pages 1–8. IEEE, 2021.
- 1023 [8] Hyunjik Kim and Andriy Mnih. Disentangling by factorising. In *International Conference on*  
1024 *Machine Learning*, pages 2649–2658, 2018.
- 1025 [9] Diederik P. Kingma and Jimmy Ba. Adam: A method for stochastic optimization. In *International*  
1026 *Conference on Learning Representations*, 2015.
- 1027 [10] Dongxin Liu, Tianshi Wang, Shengzhong Liu, Ruijie Wang, Shuochao Yao, and Tarek Ab-  
1028 delzaher. Contrastive self-supervised representation learning for sensing signals from the  
1029 time-frequency perspective. In *International Conference on Computer Communications and*  
1030 *Networks (ICCCN)*, pages 1–10. IEEE, 2021.
- 1031 [11] Ze Liu, Yutong Lin, Yue Cao, Han Hu, Yixuan Wei, Zheng Zhang, Stephen Lin, and Baining  
1032 Guo. Swin transformer: Hierarchical vision transformer using shifted windows. In *Proceedings*  
1033 *of the IEEE/CVF International Conference on Computer Vision*, pages 10012–10022, 2021.
- 1034 [12] Ilya Loshchilov and Frank Hutter. Decoupled weight decay regularization. In *International*  
1035 *Conference on Learning Representations*, 2017.
- 1036 [13] Ilya Loshchilov and Frank Hutter. SGDR: Stochastic gradient descent with warm restarts. In  
1037 *International Conference on Learning Representations*, 2017.
- 1038 [14] Xiaomin Ouyang, Xian Shuai, Jiayu Zhou, Ivy Wang Shi, Zhiyuan Xie, Guoliang Xing, and  
1039 Jianwei Huang. Cosmo: Contrastive fusion learning with small data for multimodal human  
1040 activity recognition. In *Proceedings of the 28th Annual International Conference on Mobile*  
1041 *Computing And Networking, MobiCom*, page 324–337, 2022.
- 1042 [15] Petra Poklukar, Miguel Vasco, Hang Yin, Francisco S Melo, Ana Paiva, and Danica Kragic.  
1043 Geometric multimodal contrastive representation learning. In *International Conference on*  
1044 *Machine Learning*, pages 17782–17800, 2022.
- 1045 [16] Attila Reiss and Didier Stricker. Introducing a new benchmarked dataset for activity monitoring.  
1046 In *2012 16th International Symposium on Wearable Computers*, pages 108–109. IEEE, 2012.
- 1047 [17] Aaqib Saeed, Tanir Ozcelebi, and Johan Lukkien. Multi-task self-supervised learning for human  
1048 activity detection. *Proc. ACM Interact. Mob. Wearable Ubiquitous Technol.*, 3(2), jun 2019.
- 1049 [18] Timo Sztyler and Heiner Stuckenschmidt. On-body localization of wearable devices: An  
1050 investigation of position-aware activity recognition. In *IEEE International Conference on*  
1051 *Pervasive Computing and Communications (PerCom)*, pages 1–9. IEEE, 2016.
- 1052 [19] Chi Ian Tang, Ignacio Perez-Pozuelo, Dimitris Spathis, and Cecilia Mascolo. Exploring con-  
1053 trastive learning in human activity recognition for healthcare. *arXiv preprint arXiv:2011.11542*,  
1054 2020.
- 1055 [20] Yonglong Tian, Dilip Krishnan, and Phillip Isola. Contrastive multiview coding. In *Computer*  
1056 *Vision–ECCV: 16th European Conference, Part XI 16*, pages 776–794, 2020.
- 1057 [21] Sana Tonekaboni, Danny Eytan, and Anna Goldenberg. Unsupervised representation learning  
1058 for time series with temporal neighborhood coding. In *International Conference on Learning*  
1059 *Representations*, 2021.
- 1060 [22] Terry T Um, Franz MJ Pfister, Daniel Pichler, Satoshi Endo, Muriel Lang, Sandra Hirche, Urban  
1061 Fietzek, and Dana Kulić. Data augmentation of wearable sensor data for parkinson’s disease  
1062 monitoring using convolutional neural networks. In *Proceedings of the 19th ACM international*  
1063 *conference on multimodal interaction*, pages 216–220, 2017.

- 1064 [23] Shuochao Yao, Shaohan Hu, Yiran Zhao, Aston Zhang, and Tarek Abdelzaher. Deepsense: A  
1065 unified deep learning framework for time-series mobile sensing data processing. In *Proceedings*  
1066 *of the 26th International Conference on World Wide Web*, pages 351–360, 2017.
- 1067 [24] Zhihan Yue, Yujing Wang, Juanyong Duan, Tianmeng Yang, Congrui Huang, Yunhai Tong, and  
1068 Bixiong Xu. Ts2vec: Towards universal representation of time series. *Proceedings of the AAAI*  
1069 *Conference on Artificial Intelligence*, 36(8):8980–8987, Jun. 2022.
